# Supplementary material for: Influences of Nanoparticles Characteristics on the Cellular Responses: The Example of Iron Oxide and Macrophages
Source: PubMed Central journal article supplement (PMC7075185; doi:10.3390/nano10020266), 2020-02-05
Supplement: nanomaterials-10-00266-s001.pdf [file nanomaterials-10-00266-s001.pdf]

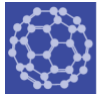

Supplementary data:

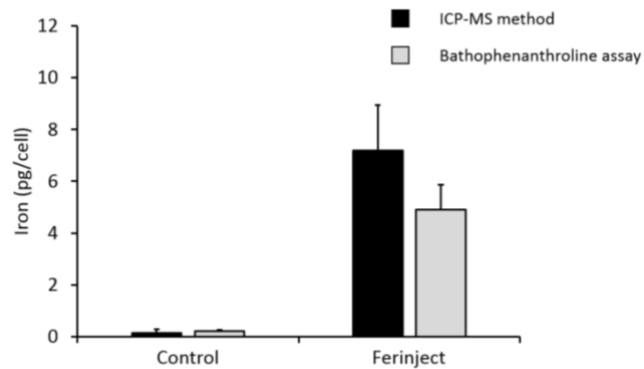

Figure S1. Quantitative assessment of the iron: validation of bathophenanthroline by comparing with another quantitative measurement which is ICP-MS method.

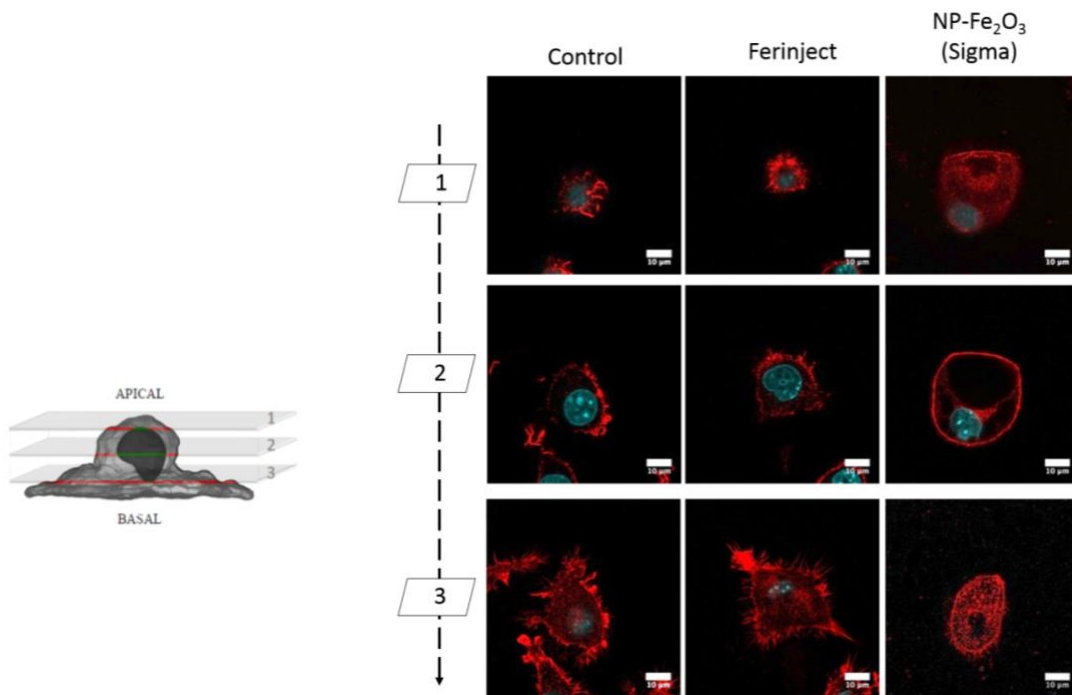

Figure S2. Confocal microscopy. Observation of actin filaments with phalloidin labeled in red (Atto 560). Cell nucleus is colored blue by Dapi. Upper section = apical microscopy view; middle section = center of cell; lower section = basal microscopy view.

**Table S1.** Quantitative bathophenanthroline assay. Iron based particles (FERINJECT or NP-Fe2O3 (Sigma)) was incubated 0h or 24h at 73°C, 5% CO2 in two different medium (H2O or culture medium + 10% FBS). For all incubation condition, iron in samples (particle + supernatant) or only supernatant were measured. Limit of detection =  $0,1 \times 10^{-3}$  mg/mL.

| Medium : H2O                     |                                                              |                                               |                                               |
|----------------------------------|--------------------------------------------------------------|-----------------------------------------------|-----------------------------------------------|
|                                  | total of sample<br>(Nanoparticle dissolved +<br>supernatant) | Supernatant<br>After 0h of incubation         | Supernatant<br>24h of incubation              |
| Ferinject<br>[iron] mg/mL        | $1,1 \pm 0,37$                                               | $0,67 \times 10^{-3} \pm 0,19 \times 10^{-3}$ | $1,05 \times 10^{-3} \pm 0,4 \times 10^{-4}$  |
| NP-Fe2O3 (Sigma)<br>[iron] mg/mL | $1,05 \pm 0,34$                                              | $0,7 \times 10^{-3} \pm 0,19 \times 10^{-3}$  | $0,97 \times 10^{-3} \pm 0,26 \times 10^{-3}$ |
| Medium : Culture medium          |                                                              |                                               |                                               |
|                                  | total of sample<br>(Nanoparticle dissolved +<br>supernatant) | Supernatant<br>After 0h of incubation         | Supernatant<br>24h of incubation              |
| Ferinject<br>[iron] mg/mL        | $1,19 \pm 0,17$                                              | $1,4 \times 10^{-3} \pm 0,29 \times 10^{-3}$  | $0,23 \times 10^{-3} \pm 0,19 \times 10^{-3}$ |
| NP-Fe2O3 (Sigma)<br>[iron] mg/mL | $0,85 \pm 0,017$                                             | undetectable                                  | undetectable                                  |

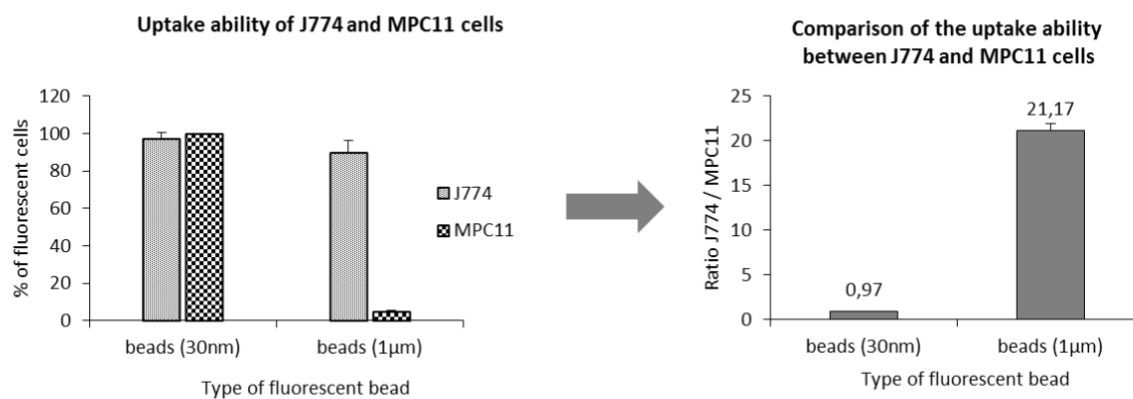

**Figure S4.** Internalization of FITC-labeled latex beads by MPC11 or RAW for 24h at 37°C, 5%CO2. 30 nm or 1 µm FITC-labeled latex beads were used. Left graphic: Mean fluorescence intensity (MFI) of cells (MPC11 non-phagocytic cells or J774 phagocytic cells) measured by Facsclibur Cytometer. Right Graphic: Ratio of MFI<sub>J774</sub> / MFI<sub>MPC11</sub>.
